1 **Social boldness correlates with brain gene expression in male green**  
2 **anoles**

3  
4 David Kabelik<sup>\*1</sup>, Allison R. Julien<sup>1</sup>, Dave Ramirez<sup>2</sup>, Lauren A. O'Connell<sup>2</sup>

5 <sup>1</sup>Department of Biology & Program in Neuroscience, Rhodes College, Memphis TN USA

6 <sup>2</sup>Department of Biology, Stanford University, Stanford, CA, 94305, USA

7  
8 Key words: RNAseq, boldness, secretin, androgen, calcium channel, ventromedial  
9 hypothalamus, reptile, lizard, integrin alpha-10, steroid hormones

10  
11 \* Please send correspondence to:

12 David Kabelik  
13 Department of Biology  
14 Rhodes College  
15 2000 N Parkway  
16 Memphis, TN 38112  
17 USA  
18 kabelikd@rhodes.edu  
19 901-843-3699 (phone)  
20 901-843-3565 (fax)

21

## 22 **Abstract**

23           Within populations, some individuals tend to exhibit a bold or shy social behavior  
24 phenotype relative to the mean. The neural underpinnings of these differing phenotypes – also  
25 described as syndromes, personalities, and coping styles – is an area of ongoing investigation.  
26 Although a social decision-making network has been described across vertebrate taxa, most  
27 studies examining activity within this network do so in relation to exhibited differences in  
28 behavioral expression. Our study instead focuses on constitutive gene expression in bold and  
29 shy individuals by isolating baseline gene expression profiles that influence social boldness  
30 predisposition, rather than those reflecting the results of social interaction and behavioral  
31 execution. We performed this study on male green anole lizards (*Anolis carolinensis*), an  
32 established model organism for behavioral research, which provides a crucial comparison group  
33 to investigations of birds and mammals. After identifying subjects as bold or shy through  
34 repeated reproductive and agonistic behavior testing, we used RNA sequencing to compare  
35 gene expression profiles between these groups within various forebrain, midbrain, and hindbrain  
36 regions. The ventromedial hypothalamus had the largest group differences in gene expression,  
37 with bold males having increased expression of calcium channels and neuroendocrine receptor  
38 genes compared to shy males. Conversely, shy males express more integrin alpha-10 in the  
39 majority of examined regions. There were no significant group differences in physiology or  
40 hormone levels. Our results highlight the ventromedial hypothalamus as an important center of  
41 behavioral differences across individuals and provide novel candidates for investigation into the  
42 regulation of individual variation in social behavior phenotype.

## 43 **Introduction**

44           Individuals vary widely in their social boldness. Some individuals perform many high  
45 intensity behaviors within moments of participating in a novel social encounter, while others  
46 hesitantly engage in few, low-intensity interactions. Often, social boldness is consistent across  
47 different social environments (Coppens et al., 2010; Stamps and Groothuis, 2010). Although a  
48 continuum of such behavioral propensity usually exists within a population, we can categorize  
49 individuals at each end of such a continuum as either behaviorally 'bold' or 'shy' based on the  
50 latency, frequency, and intensity of exhibited social behaviors across contexts. Such behavioral  
51 phenotypes, also referred to as behavioral syndromes, personalities, or coping styles (Koolhaas  
52 et al., 1999; Réale et al., 2010; Sih et al., 2004), often manifest as correlated suites of  
53 behavioral outputs, presumably due to regulation by shared neural underpinnings. The neural  
54 substrates that lead an individual toward exhibiting a bold or shy phenotype likely rely on brain  
55 regions involved in social decision-making (Newman, 1999; O'Connell and Hofmann, 2011,  
56 2012), and neuroendocrine mediators of these circuits (Baugh et al., 2012; Félix et al., 2020;  
57 Ketterson and Nolan Val, 1999). Although numerous neural systems have been associated with  
58 social behavioral output, the bases of stable bold-shy behavioral phenotypes remain poorly  
59 understood.

60           Among vertebrates, the lack of understanding of neuroendocrine regulators of behavioral  
61 phenotypes is especially true among non-avian reptiles, as they are the least studied vertebrate  
62 taxonomic group (Kabelik and Hofmann, 2018), despite serving as an important evolutionary  
63 comparison group, especially for amniotic vertebrates. A social decision-making network has  
64 been described in reptiles (Kabelik et al., 2018), and various neuroendocrine variables have  
65 been related to the expression of social behaviors in lizards (Dunham and Wilczynski, 2014;  
66 Hartline et al., 2017; Kabelik et al., 2013, 2008b; Kabelik and Crews, 2017; Kabelik and  
67 Magruder, 2014; Korzan et al., 2001; Korzan and Summers, 2004; Larson and Summers, 2001;

68 Smith and Kabelik, 2017; Watt et al., 2007; Sarah C. Woolley et al., 2004; Woolley et al., 2001;  
69 Sarah C Woolley et al., 2004). However, many potential regulators of social boldness remain  
70 unexamined. In this study, we compare neural gene expression from various brain regions of  
71 male green anoles (*Anolis carolinensis*) that exhibit stable bold and shy phenotypes in order to  
72 identify potential regulatory variables. Green anoles are a longstanding model for social  
73 behavior investigation (Lovern et al., 2004), and they have recently become a model for  
74 comparative genomic investigation (Alföldi et al., 2011), making them an ideal subject species  
75 for the present study. We focus here on male green anoles because they exhibit high levels of  
76 both reproductive and aggressive behaviors, and our aim was to differentiate individuals based  
77 on boldness within both contexts.

78 While many studies of social boldness examine gene expression resulting from the  
79 performance of specific social behaviors (e.g., Mukai et al., 2009; Wong et al., 2012; Zayed &  
80 Robinson, 2012), or by adoption of a dominant or submissive status within a social hierarchy  
81 (e.g., Eastman et al., 2020; Renn et al., 2008), here we examine differences in baseline neural  
82 gene expression among subjects that have been extensively screened within different social  
83 contexts and assigned to a bold or shy phenotype category. This design eliminates gene  
84 expression differences associated with expressed behavioral output and instead places focus  
85 on the neural state differences that predispose individuals toward bold or shy behavioral outputs  
86 prior to engaging in a behavioral encounter with a conspecific. Additionally, the examined males  
87 are housed individually and thus hold identical home 'territories', eliminating social status-  
88 related gene transcription. We selected five bold and five shy individuals for our analysis and  
89 compared gene expression profiles between these experimental groups across four forebrain,  
90 one midbrain, and one hindbrain region. These individuals did not differ in body size or baseline  
91 steroid hormone levels. However, our gene expression analyses show differential regulation of  
92 integrin alpha-10 across brain regions of bold versus shy subjects, and a prominent role for

93 calcium channels and various neuroendocrine factors within the ventromedial hypothalamus,  
94 including androgen and secretin receptors.

95

## 96 **Materials and Methods**

### 97 *Subjects*

98 Fifty-seven focal male green anoles (*Anolis carolinensis*) were obtained from a  
99 commercial supplier. These males were housed singly within terraria (30.5 cm H x 26 cm W x  
100 51 cm L) and kept in breeding season conditions: long-day (14 light:10 dark) full-spectrum  
101 lighting, 12 hours of supplemental heat provided 5 cm above one end of a wire-mesh terrarium  
102 lid by means of a 60-W incandescent light bulb, and thrice-weekly feeding with crickets.  
103 Additional males and females from our housing colony were used in social interactions. All  
104 procedures involving live animals were conducted according to federal regulations and  
105 approved by the Institutional Animal Care and Use Committee at Rhodes College.

106

### 107 *Social behavior boldness assessment*

108 Focal males were each assessed three times with different conspecifics for social  
109 boldness within each of three social encounter scenarios – reproductive encounter, agonistic  
110 encounter as a resident, and agonistic encounter as an intruder. Thus, each focal male's  
111 behavior was scored in nine separate 10-min behavioral encounters, and a maximum of one  
112 social encounter per focal male was run per day. The *reproductive behavior* scenario involved  
113 two conspecific adult females simultaneously placed into the focal male's terrarium. Two  
114 females were used to maximize the probability of eliciting reproductive behaviors from the focal  
115 male. We recorded the frequency (sum of behaviors per 10-min session) and latency to first

116 performance (minute of first occurrence of any listed behavior) of the following behaviors: head  
117 bob bout, push-up bout, dewlap extension bout, dewlap extension bout with push up, chase,  
118 and copulate. Focal males that failed to display any behaviors were assigned the maximum  
119 latency score of 10 min. The maximum intensity of behavioral display was also scored from 0-3  
120 based on the highest achieved category: no display, display only, chase, and copulate. The  
121 *agonistic encounter as a resident* scenario involved a size-matched (within 3 mm snout-vent  
122 length) adult conspecific male intruder being placed within the focal male's terrarium. Behaviors  
123 were scored as in the reproductive encounter, except that biting of the stimulus male replaced  
124 copulation as the highest intensity behavior. The *agonistic encounter as an intruder* scenario  
125 involved the focal male being taken out of his terrarium and placed into the terrarium (home  
126 territory) of a size-matched adult conspecific male. Behavioral scoring was the same as in the  
127 previous agonistic scenario. Stimulus animals were also only used once per day, and no  
128 behavioral trials involved the repeated pairing of the same subjects.

129

### 130 *Bold-shy categorization*

131 We conducted principal components analysis (PCA) using SPSS Statistics 22 (IBM) to  
132 reduce the average behavioral latency, frequency, and intensity scores from each of the three  
133 social behavior interaction scenarios into a single value. In each scenario, the resulting analysis  
134 generated a single PCA axis with an eigenvalue  $> 1$ , and in each case, this axis was highly  
135 positively correlated with average frequency and intensity scores, and negatively with average  
136 latency scores ( $r > \pm 0.73$ ,  $p < 0.001$  for each). This PCA axis 1 explained 65% of the behavioral  
137 variation in the reproductive boldness trial, 79% of the variation in the agonistic trial as resident,  
138 and 80% of the variation in the agonistic trial as intruder. We used these PCA axes to correlate  
139 boldness across behavioral scenarios. We also took an average of these three PCA axes to use  
140 in selecting bold and shy individuals for the RNAseq portion of this study. Because the average

141 PCA axis 1 score differed across the three behavioral testing blocks ( $F(2,54)=4.23$ ,  $p=0.02$ ), we  
142 ranked focal males based on this average PCA principal component axis 1 score within each  
143 behavioral block. We then chose the highest and lowest scoring focal male within each block, as  
144 well as the next highest and next lowest scoring focal male in two of the three blocks. This  
145 resulted in selection of the five most socially 'bold' and five most 'shy' males out of the 57 focal  
146 males screened for behavioral consistency.

147

#### 148 *Tissue harvesting and brain tissue punching*

149 Prior to handling for blood and brain harvesting, focal subjects were left undisturbed in  
150 their home terraria for 24 h. We euthanized focal males by cutting through the spinal column  
151 and immediately collected trunk blood for hormone analyses (average collection time from first  
152 handling was  $162 \pm 3.2$  s). The blood was kept at 4°C until centrifugation. The brain was then  
153 rapidly dissected, placed within a microcentrifuge tube filled with Tissue Tek (Sakura) cutting  
154 medium, and frozen under dry ice (average time from first handling to freezing of brain was  $544$   
155  $\pm 8.4$  s). The body (minus the head) was then weighed, after which the testes were dissected  
156 from the body and also weighed. Brains were sectioned at 100  $\mu\text{m}$  on a Microm HM 520  
157 cryostat (Thermo Scientific). The sections were laid onto glass microscope slides resting on a  
158 metal block within the cryostat at -19°C. Tissue punches of selected areas were obtained using  
159 a Stoelting brain punch set with the aid of a dissecting microscope (Olympus SZX7) mounted  
160 above the cryostat. Brain punches were placed into Trizol (Invitrogen) and frozen at -80°C.  
161 Either 1 mm or 1.5 mm tissue punches were used to obtain tissue from selected brain regions.  
162 These were as follows: POA-LS, a region including the preoptic area, anterior hypothalamus,  
163 paraventricular nucleus of the hypothalamus, and septal nuclei; HIP, a region of the medial  
164 cortex, which is at least partly homologous to the mammalian hippocampus (Desfilis et al.,  
165 2018; Striedter, 2016; Tosches et al., 2018); DVR, including the subcortical pallium (dorsal

166 ventricular ridge, including amygdaloid nuclei) as well as striatum; VMH, the ventromedial  
167 hypothalamus; MID, the midbrain tegmentum; HIND, the pons and rostral medulla, though not  
168 cerebellum. Brain regions were determined by reference to multiple atlases and publications  
169 (Bruce and Braford, 2009; Butler and Hodos, 2005; Greenberg, 1982; Hoops et al., 2018; Jarvis,  
170 2008; Kabelik et al., 2014; Lopez et al., 1992; Naik et al., 1981; O'Connell and Hofmann, 2011;  
171 Rosen et al., 2002; ten Donkelaar, 1998).

172

### 173 *Hormone analyses*

174 Blood samples were centrifuged and plasma (averaging  $77 \pm 3.3 \mu\text{l}$ ) was frozen at  $-80^{\circ}\text{C}$   
175 until hormone analysis. We quantified testosterone (ADI-900-065; sensitivity 5.67 pg/mL),  
176 estradiol (ADI-900-008; sensitivity 28.5 pg/mL), progesterone (ADI-900-011; sensitivity 8.57  
177 pg/mL), and cortisol (ADI-900-071; sensitivity 56.72 pg/mL) using enzyme-linked  
178 immunosorbent assay (ELISA) kits (Enzo Life Sciences, Farmingdale, NY). The cortisol kit  
179 cross-reacts with corticosterone at 28%, representing a general glucocorticoid assay, albeit with  
180 lower-than-typical sensitivity. Samples were run across two plates for each hormone and the  
181 inter-assay variation across plates and the intra-assay variance for each plate is as follows:  
182 testosterone (inter: 5.6%; intra: 5.6% and 6.1%), estradiol (inter: 4.1%; intra: 3.7% and 8.5%),  
183 progesterone (inter: 4.7%; intra: 2.3% and 4.7%), and cortisol (inter: 6.4%; intra: 3.8% for both  
184 plates). We re-suspended 7  $\mu\text{l}$  of plasma in 203  $\mu\text{L}$  of the appropriate assay buffer and ran each  
185 sample in duplicate as per manufacturer's instructions. Hormone results were generally  
186 consistent with previously reported levels in this species (Greenberg and Crews, 1990).

187

### 188 *RNA sequencing and analyses*



189 Brain RNA was extracted using Trizol according to manufacturer's instructions (Thermo  
190 Fisher Scientific). Poly-adenylated RNA was isolated from each sample using the NEXTflex  
191 PolyA Beads purification kit (Perkin Elmer). Strand-specific libraries with unique barcodes were  
192 prepared using the NEXTFLEX Rapid Directional RNA-Seq kit 2.0 according to manufacturer's  
193 instructions (Perkin Elmer). Libraries were pooled in equal molar amounts and sequenced on an  
194 Illumina HiSeq 2500 to obtain roughly 40 million reads per sample.

195 We first applied quality and adaptor trimming to the raw reads using Trim Galor!  
196 ([http://www.bioinformatics.babraham.ac.uk/projects/trim\\_galore/](http://www.bioinformatics.babraham.ac.uk/projects/trim_galore/); parameters: trim\_galore --  
197 paired --phred33 --length 36 -q 5 --stringency 5 --illumina -e 0.1). Reads were then aligned  
198 using kallisto (Bray et al., 2016) with default parameters to the *Anolis carolinensis* cDNA  
199 reference transcriptome (Anolis\_carolinensis.AnoCar2.0.cdna.all.fa.gz) downloaded from  
200 Ensembl (May 2020). Read counts were combined into a single matrix. Differences in gene  
201 expression within each brain region were calculated using DESeq2 (Love et al., 2014) within the  
202 *in silico* Trinity pipeline ( $p < 0.05$ , 4-fold change). We corrected p-values for multiple hypothesis  
203 testing and considered transcripts with false discovery rate (FDR) correct p-values  $< 0.05$   
204 significantly differentially expressed. We performed a gene ontology enrichment analysis for  
205 differentially expressed genes in the ventromedial hypothalamus using the PANTHER (version  
206 14; <http://pantherdb.org/>; Mi et al., 2019). Data visualizations were made in RStudio (version  
207 1.3.1056) running R (version 3.5.2). Boxplots and bar charts were made with ggplot2 (version  
208 3.3.0) and the volcano plot was generated using EnhancedVolcano (version 1.0.1).

209

## 210 *Statistical analyses*

211 Some behavioral scores and all hormone levels were ln-transformed to meet  
212 assumptions of parametric analyses. Data reduction was conducted using PCA, and the  
213 comparison of the average resultant score across behavioral testing blocks was conducted

214 using one-way analysis of variance. Correlations among behavioral scores were conducted  
215 using Pearson's  $r$ . Behavioral and physical differences between bold and shy focal males were  
216 examined via independent-samples  $t$ -tests, except for behavioral intensity measure, which was  
217 compared using a Mann-Whitney  $U$  test. Scatterplots of PCA scores were made with ggplot2  
218 (version 3.3.0) in RStudio (version 1.3.1056) running R (version 3.5.2).

219

#### 220 *Data availability*

221 Data from the behavior and hormone analyses, as well as RNA sequencing analysis, including  
222 count matrices, GO enrichment analyses, and differential expression statistics, are available in  
223 the Supplementary Excel File. Raw sequencing reads are available on the Sequence Read  
224 Archive (submission pending acceptance).

225

## 226 **Results**

### 227 *Correlated behavioral traits are stable within individuals*

228 Individual differences in social boldness are relatively stable across different types of  
229 social encounters. In **Figure 1**, we present correlations between focal males in the reproductive,  
230 agonistic as a resident, and agonistic as an intruder scenario, reflecting latency, frequency, and  
231 intensity measures reduced into a single principal component axis for each scenario. We found  
232 positive correlations between boldness scores across all behavioral scenarios: reproductive  
233 boldness and boldness as the resident in an agonistic trial ( $r=0.55$ ,  $N=57$ ,  $p<0.001$ ), between  
234 boldness as the resident in an agonistic trial and boldness as the intruder in an agonistic trial  
235 ( $r=0.50$ ,  $N=57$ ,  $p<0.001$ ), and between reproductive boldness and boldness as the intruder in an  
236 agonistic trial ( $r=0.29$ ,  $N=57$ ,  $p=0.026$ ).

237

238 *Behavioral, but not physiological, traits differ between bold and shy individuals*

239 Relative to shy males, the bold males showed a higher average frequency of  
 240 reproductive behaviors, agonistic behaviors as a resident, and agonistic behaviors as an  
 241 intruder. Similarly, the bold males exhibited lower average latencies to first reproductive  
 242 behavior, to first agonistic behavior as a resident, and to first agonistic behavior as an intruder.  
 243 Bold males also exhibited higher average behavioral intensities to females, as resident males in  
 244 agonistic trials, and as intruder males in agonistic trials. However, behavioral boldness was not  
 245 correlated with physical or hormonal characteristics. Bold and shy focal males did not differ in  
 246 snout-vent length, or body-minus-head mass (body was weighed after brain removal, so as not  
 247 to delay freezing of brain tissue). Likewise, these groups did not differ in testes mass, or in  
 248 circulating testosterone, estradiol, progesterone, or glucocorticoid levels.

249 **Table 1.** Mean and standard error (S.E.) values for behavioral and physical variables of bold  
 250 and shy male green anoles. No physical but all behavioral variables differ between bold and shy  
 251 groups. Parametric comparisons state the *t* statistic (*t*) and degrees of freedom (*df*);  
 252 nonparametric comparisons state the *U* statistic (*U*) and the sample size (*N*); both state the  
 253 probability of significance (*P*) at  $\alpha=0.05$ .

|                                                | Shy<br>mean | Shy<br>S.E. | Bold<br>mean | Bold<br>S.E. | <i>t/U</i> | Df/N | P                |
|------------------------------------------------|-------------|-------------|--------------|--------------|------------|------|------------------|
| <b>Behavioral Variables:</b>                   |             |             |              |              |            |      |                  |
| reproductive behavior<br>frequency (#/10 min)  | 11.1        | 2.62        | 27.9         | 1.72         | -5.36      | 8    | <b>0.001</b>     |
| resident agonistic<br>frequency (#/10 min)     | 4.3         | 2.86        | 38.4         | 6.08         | -5.07      | 8    | <b>0.001</b>     |
| intruder agonistic<br>frequency (#/10 min)     | 7.7         | 2.71        | 32.3         | 3.58         | -5.50      | 8    | <b>0.001</b>     |
| reproductive behavior<br>latency (min)         | 3.7         | 0.80        | 1.1          | 0.06         | 3.44       | 8    | <b>0.009</b>     |
| resident agonistic latency<br>(min)            | 6.9         | 1.07        | 1.0          | 0.00         | 10.36      | 8    | <b>&lt;0.001</b> |
| intruder agonistic latency<br>(min)            | 7.6         | 0.81        | 1.6          | 0.24         | 7.13       | 8    | <b>&lt;0.001</b> |
| reproductive behavior<br>intensity (0-4 scale) | 0.9         | 0.07        | 1.5          | 0.17         | 1.50       | 10   | <b>0.016</b>     |
| resident agonistic intensity<br>(0-4 scale)    | 0.7         | 0.35        | 2.3          | 0.29         | 1.50       | 10   | <b>0.016</b>     |

|                                          |     |      |     |      |      |    |              |
|------------------------------------------|-----|------|-----|------|------|----|--------------|
| intruder agonistic intensity (0-4 scale) | 0.5 | 0.22 | 2.0 | 0.13 | 0.00 | 10 | <b>0.008</b> |
|------------------------------------------|-----|------|-----|------|------|----|--------------|

**Physical Variables:**

|                         |     |      |     |      |       |   |      |
|-------------------------|-----|------|-----|------|-------|---|------|
| snout-vent length (mm)  | 6.0 | 0.07 | 6.0 | 0.10 | 0.00  | 8 | 1.00 |
| body mass (g)           | 3.3 | 0.07 | 3.4 | 0.08 | -0.75 | 8 | 0.48 |
| testes mass (g)         | 0.1 | 0.00 | 0.1 | 0.01 | -0.26 | 8 | 0.80 |
| testosterone (ng/ml)    | 2.2 | 1.08 | 1.5 | 0.14 | 0.30  | 8 | 0.77 |
| estradiol (ng/ml)       | 9.3 | 5.68 | 5.2 | 1.78 | 0.68  | 8 | 0.74 |
| progesterone (ng/ml)    | 0.6 | 0.06 | 0.8 | 0.21 | -0.97 | 8 | 0.14 |
| glucocorticoids (ng/ml) | 7.0 | 3.14 | 4.8 | 0.59 | 0.25  | 8 | 0.81 |

254

255

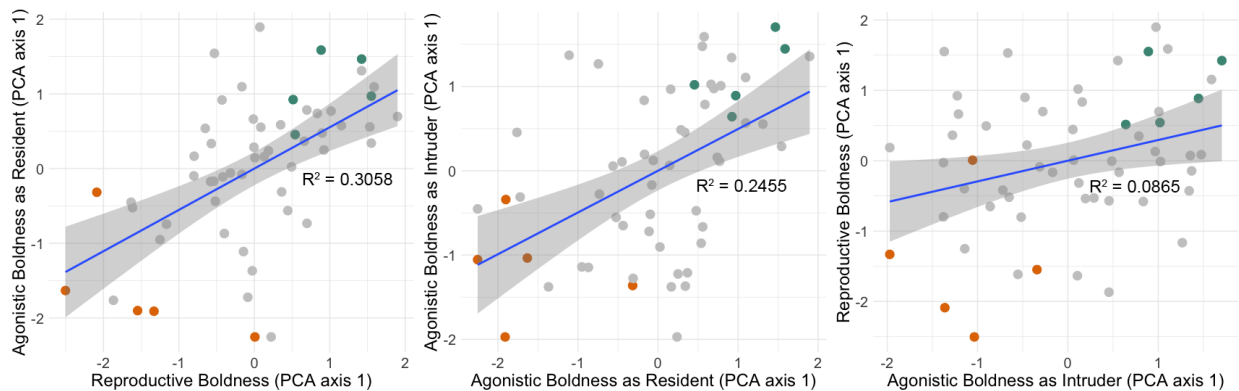

256

257 **Figure 1. Focal male green anole lizards exhibit stable social boldness phenotypes.** (Left) Average  
 258 boldness in three reproductive encounters correlates strongly with average boldness as the resident male  
 259 in three separate agonistic encounters. (Middle) Average boldness as the resident male correlates  
 260 strongly with average boldness as an intruder within three separate agonistic encounters. (Right) Average  
 261 boldness as the intruder male in three separate agonistic encounters correlates weakly with average  
 262 reproductive boldness to three pairs of females. Social boldness is represented by PCA axis 1 values,  
 263 which are positively correlated with average behavioral frequency and intensity, and negatively correlated  
 264 with average latency to display, within each behavioral encounter scenario. Trials were carried out in  
 265 three blocks. One to two focal males with the highest combined PCA values per block ('bold', shown in  
 266 blue-green), and one to two focal males with the lowest combined PCA values per block ('shy', shown in  
 267 orange) were selected for the bold-shy neural RNA sequencing comparison.

268

269 *Boldness is associated with gene upregulation in the ventromedial hypothalamus*

270 We measured baseline gene expression in bold and shy individuals across six brain  
 271 regions that contribute to social decision-making and are functionally conserved across  
 272 vertebrates (Kabelik et al., 2018; Newman, 1999; O'Connell and Hofmann, 2011, 2012;

273 Thompson et al., 2008; Walton et al., 2010) (**Figure 2A**; Supplemental Excel File). The number  
274 of differentially expressed genes across brain regions were relatively few (average of 8), with  
275 the exception of the ventromedial hypothalamus, where 608 genes were differentially  
276 expressed. Across brain regions, only integrin alpha-10 (*itga10*) was consistently downregulated  
277 in bold individuals compared to shy individuals (**Figure 2B**), with the exception of the dorsal  
278 ventricular ridge where expression of this gene was not detected.

279         Since the ventromedial hypothalamus had a drastically different patterns in baseline  
280 gene expression between bold and shy individuals, we explored these patterns in more detail.  
281 There were 601 genes upregulated and 7 downregulated in bold individuals compared to shy  
282 individuals (**Figure 2C**). We examined gene ontology annotations for differentially expressed  
283 genes and found enriched molecular function of calcium channel activity ( $p=5.04 \times 10^{-4}$ ). Indeed,  
284 at least seven voltage-gated calcium channel genes were upregulated in bold individuals  
285 (**Figure 2D**). While many differentially expressed genes are unannotated and labeled as “novel  
286 transcripts”, we noted several that have established roles in regulating behavior or have a log  
287 fold change of greater than 5. This includes the androgen receptor (*ar*,  $p=0.014$ ) and the two  
288 subunits of the NMDA receptor, *grin1a* ( $p<0.001$ ) and *grin2b* ( $p<0.001$ ). Expression of integrin  
289 alpha-10 was downregulated in bold individuals ( $p=0.017$ ), similar to other brain regions. Finally,  
290 some genes had a large fold change increased in bold individuals, including a potassium  
291 channel (*kcnh1-like*,  $p>0.001$ ), the secretin receptor (*sctr*,  $p=0.02$ ), and an unknown g protein-  
292 coupled receptor ( $p=0.003$ ).

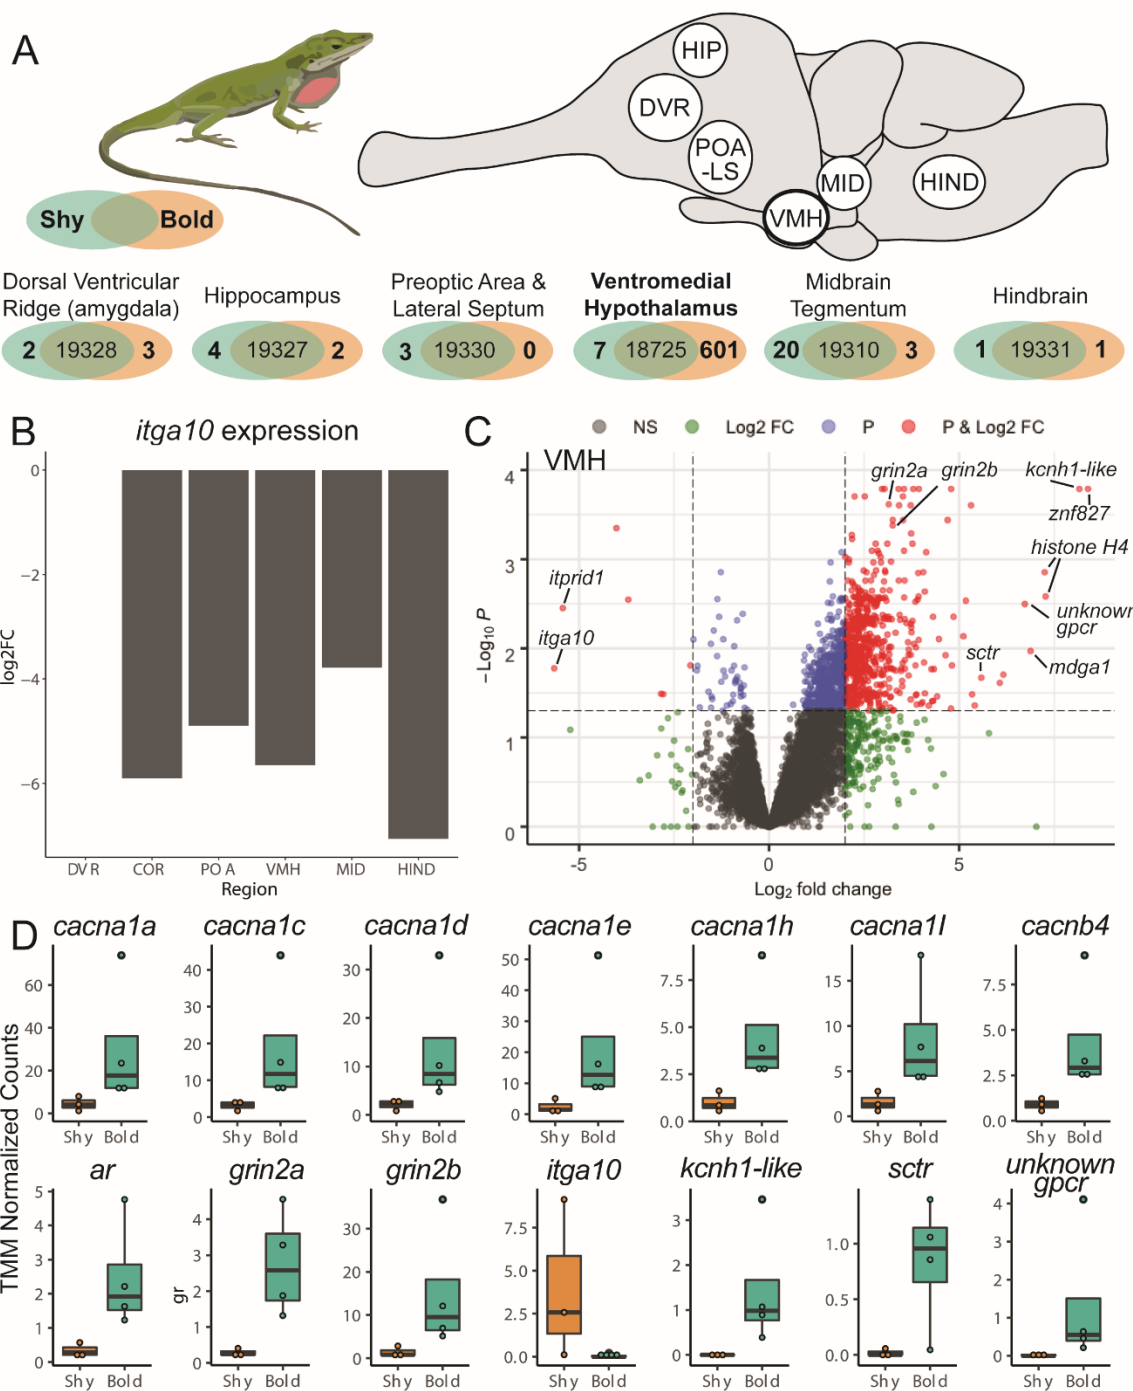

294 **Figure 2. Baseline brain gene expression in bold and shy anoles highlights the ventromedial**  
295 **hypothalamus. (A)** RNA sequencing was used to quantify gene expression in six different brain regions in  
296 bold (orange) and shy (blue-green) individuals. The number of differentially expressed genes in each brain  
297 region is shown in the Venn diagrams. **(B)** Integrin alpha-10 (*itga10*) was downregulated in bold anoles  
298 across almost all brain regions. The log fold change ( $\log_2FC$ ) is shown in bar plots. **(C)** A volcano plot  
299 highlights the genes that are differentially expressed in the ventromedial hypothalamus, where the cutoff  
300 for significance (red dots beyond the dashed lines) is  $p < 0.05$  with false discovery rate correction and a log  
301 fold change of two or greater. **(D)** Select differentially expressed genes are shown, including voltage-gated  
302 calcium channels (top) and other genes previous linked to behavior and/or with large fold changes in  
303 expression (bottom). Boxplots show rectangles as the lower and upper quartiles (with the median as the  
304 line) and whiskers that indicate the maximum and minimum values; individual data points are shown as  
305 dots.

306

## 307 Discussion

308 Most behaviorally linked gene expression studies examine changes resulting from  
309 participation in behavioral trials or the establishment of dominant or subordinate status within a  
310 social hierarchy. However, such comparisons make it difficult to ascertain what variables are  
311 predisposing animals to exhibit a bold or shy phenotype in the first place, as such studies will  
312 also detect gene transcription differences that result from the perception of conspecifics and  
313 performance of varied levels of behaviors toward other individuals. Hence, to remove  
314 perception-related and performance-based gene expression, and thus focus on neural  
315 differences that predispose individuals toward bold or shy behavioral profiles, we examined  
316 male green anoles under baseline conditions. These anoles had been previously screened  
317 under three different social conditions, and repeatedly within each condition. We found highly  
318 stable boldness phenotypes, which transcended social context. That is, in relation to shy males,  
319 bold males tended to behave more quickly and to exhibit greater numbers and higher intensities  
320 of courtship behaviors within reproductive trials, and of aggressive behaviors within agonistic  
321 trials. This correlation of social boldness across contexts is in line with expectations for  
322 consistent behavioral phenotypes (Coppens et al., 2010; Stamps and Groothuis, 2010). Thus,  
323 our gene expression analysis investigates neural correlates of a general social boldness.

324

325 *Social boldness phenotype is unrelated to circulating steroid hormone levels*

326           While there were many behavioral differences between bold and shy individuals in this  
327 study, we did not find any group differences in circulating hormone levels or body size. We  
328 expected testosterone, estradiol, progesterone, or glucocorticoid levels to correlate with  
329 individual differences in behavior. Previous findings suggesting steroidal regulation of behavioral  
330 expression include research on male tree lizards, which found correlations between circulating  
331 testosterone levels and aggressive behavior display frequency and intensity (Kabelik et al.,  
332 2006). Manipulative studies in the same species demonstrated that both testosterone and  
333 progesterone promote faster, more frequent, and more intense displays of aggression (Kabelik  
334 et al., 2008b; Weiss and Moore, 2004). Similarly, in male side-blotched lizards, circulating  
335 testosterone levels are higher in the more aggressive morph (Sinervo et al., 2000). However,  
336 while we cannot rule out organizational effects of steroid hormones on social behavior  
337 phenotype in male green anoles, we find no evidence for activational effects of any of these  
338 steroid hormones on boldness phenotype.

339           Studies examining other vertebrate taxa have found mixed associations between  
340 circulating steroid hormone levels and behavioral boldness. For example, testosterone  
341 treatment in African striped mice (*Rhabdomys pumilio*) increases boldness behavior (Raynaud  
342 and Schradin, 2014), and acute 17 $\alpha$ -ethinylestradiol (an estrogen mimic) decreases boldness  
343 behavior in Siamese fighting fish (*Betta splendens*). However, aromatase inhibitors decrease  
344 boldness in female Siamese fighting fish, highlighting a role for local hormone synthesis within  
345 the brain that may regulate behavioral phenotypes. As aromatase was not differentially  
346 expressed between bold and shy males within this study, functional manipulations would be  
347 required to determine a causal role for steroid hormone synthesis in the brain and any  
348 relationships with individual variation in behavior.



349 Studies attempting to link hormones to behavioral phenotypes often measure hormone  
350 levels after a behavioral stimulus is presented, but our study focused instead on baseline levels  
351 of hormones. Similar to our finding in green anoles, bold and shy male zebrafish do not differ in  
352 baseline cortisol levels (Oswald et al., 2012), suggesting that baseline hormone levels may be  
353 unlinked to behavioral phenotypes. Instead, hormones may influence behavioral syndromes  
354 through differential abundance of their receptors within the brain.

355

### 356 *Differentially expressed genes and a regulatory role for the ventromedial hypothalamus*

357 When comparing forebrain, midbrain, and hindbrain regions of bold versus shy male  
358 green anole lizards, we found the greatest number of differentially expressed genes within the  
359 ventromedial hypothalamus, a node within the social decision-making neural network (O'Connell  
360 and Hofmann, 2011). We were initially surprised to find so few genes differentially expressed  
361 within other brain regions, but the patterns here represent a constitutive state, rather than a  
362 response to a behavioral stimulus that would be expected to induce a greater change in gene  
363 expression across brain regions. The ventromedial hypothalamus has been implicated in the  
364 regulation of both reproductive and agonistic behaviors, making it a logical location for  
365 regulation of general social behavior boldness. For instance, both copulatory and agonistic  
366 conditions have been shown to upregulate markers of neural activity within the Syrian hamster  
367 ventromedial hypothalamus, although copulation tends to induce more c-Fos expression (an  
368 immediate early gene product and proxy marker of neural activity) in the medial portions of the  
369 nucleus, while agonistic situations tend to increase c-Fos in the lateral ventromedial  
370 hypothalamus (Kollack-Walker and Newman, 1995). Additionally, stimulation of the lateral  
371 portions of the rat ventromedial hypothalamus has been shown to elicit aggressive responses  
372 (Kruk, 1991). The ventromedial hypothalamus therefore seems a likely social behavior  
373 integration center, owing to its regulatory role in various types of social behavior expression.

374 A prominent category of differentially expressed genes within the ventromedial  
375 hypothalamus was voltage-gated calcium channels. Voltage-gated calcium channels regulate  
376 both intracellular calcium levels as well as general neuronal excitability, and have been linked to  
377 a number of neuropsychiatric symptoms in humans, including bipolar disorder, depression, and  
378 attention deficit hyperactivity disorder (Kabir et al., 2017). In addition to voltage-gated calcium  
379 channels, we also found that expression of ligand-gated calcium channel NMDA subunits is  
380 upregulated in bold individuals. NMDA receptor regulation has been linked to behavioral  
381 boldness in birds (Audet et al., 2018), suggesting the tuning of calcium channel expression may  
382 be a conserved feature of behavioral variability. Indeed, increased intracellular calcium levels  
383 induce signaling cascades that can lead to changes in transcription, such as the  
384 phosphorylation of cyclic adenosine monophosphate response element binding protein (CREB),  
385 which has been linked to synaptic, neuronal, and behavioral plasticity (Hofmann, 2003). In tree  
386 lizards, the dorsolateral portions of the ventromedial hypothalamus show increased neural  
387 activity as measured by an increase in pCREB following an agonistic encounter (Kabelik et al.,  
388 2008a). Thus, a number of neural activity-regulating channels differ in baseline gene expression  
389 between bold and shy males, highlighting neuronal excitability in the ventromedial  
390 hypothalamus as a contributor to stable individual variation in behavior.

391 In the ventromedial hypothalamus, we also observed increased gene expression of a  
392 few neuromodulators with strong ties to behavior. For example, although we did not find  
393 significant differences in testosterone levels between bold and shy individuals, we did find an  
394 increase in androgen receptor expression in bold individuals. This finding is exciting given that  
395 androgen receptor presence within the ventromedial hypothalamus occurs within its dorsolateral  
396 aspect (Rosen et al., 2002), the same region of the ventromedial hypothalamus that has been  
397 previously linked to the expression of aggressive behavior in male tree lizards (Kabelik et al.,  
398 2008a). Apart from androgen receptor gene expression, we also found an increase in

399 expression of the secretin receptor in bold individuals. Secretin receptor expression is  
400 widespread in the brain and although central secretin signaling is primarily known for its role in  
401 regulating neurodevelopment and memory function via effects on synaptic plasticity, secretin  
402 has also been shown to regulate anxiety and associated behaviors (Nishijima et al., 2006; Wang  
403 et al., 2019), as well as activity of reproductive circuitry (Csillag et al., 2019). Secretin has been  
404 shown to regulate GABAergic transmission to gonadotropin-releasing hormone-producing cells  
405 (Csillag et al., 2019), as well as affecting the firing rate of over 50% of examined paraventricular  
406 hypothalamus neurons in rat *in vivo* studies (Chen et al., 2013). These studies suggest a role for  
407 secretin as a widespread modulator of neural function, and as such, secretin may also regulate  
408 social behavior via modulation of neuronal activity within the ventromedial hypothalamus.

409         Across most brain regions, integrin alpha-10 was the one gene consistently  
410 downregulated in bold individuals. Integrins are typically associated with neuronal development,  
411 as they can detect and transmit mechanical force on extracellular matrices into an intracellular  
412 signal (Takada et al., 2007). The role of integrin alpha-10 is not well understood, especially in  
413 the context of behavior. Integrin alpha-10 in humans is associated with the 1q21.1 chromosomal  
414 region, which when deleted leads to thrombocytopenia absent radius (TAR) (Brunetti-Pierri et  
415 al., 2008). Genome wide association studies in humans has also linked integrin alpha-10 to  
416 bipolar disorder (Pedroso et al., 2012). Thus, a role for integrin alpha-10 in natural variation in  
417 behavioral strategies beyond that of human disease is a promising avenue of future research.

418

## 419 **Conclusion**

420         Our study focuses on constitutive differences across bold or shy individuals by isolating  
421 baseline hormone levels and brain gene expression profiles that influence social boldness  
422 predisposition, rather than those reflecting the results of social interaction and behavioral

423 execution. We found that correlated behavioral traits were not driven by differences in steroid  
424 hormone levels or body size, as these were consistent across treatment groups. Instead, brain  
425 gene expression differences strongly relate to social boldness and likely reflect variables  
426 involved in the neural circuitry that regulates social boldness. Specifically, we found that  
427 baseline differences between bold and shy males were associated with gene expression in the  
428 ventromedial hypothalamus, where expression of voltage-gated calcium channels, the androgen  
429 receptor, and the secretin receptor were increased in bold individuals. We suggest that studies  
430 should include examination of the ventromedial hypothalamus as a potential regulator of social  
431 behavior boldness in reptiles as well as across other vertebrate taxa.

432

### 433 **Acknowledgements**

434 DR and LAO acknowledge that Stanford University resides on the ancestral and  
435 unceded land of the Muwekma Ohlone Tribe.

436

### 437 **Funding**

438 We gratefully acknowledge support from Rhodes College and the James T. and Valeria  
439 B. Robertson Chair in Biological Sciences to DK and the National Institutes of Health  
440 [DP2HD102042] to LAO. LAO is New York Stem Cell Foundation – Robertson Investigator.

441

### 442 **Declaration of competing interest**

443 The authors have no competing interest to declare.

444

## 445 References

- 446 Alföldi, J., Di Palma, F., Grabherr, M., Williams, C., Kong, L., Mauceli, E., Russell, P., Lowe,  
447 C.B., Glor, R.E., Jaffe, J.D., Ray, D.A., Boissinot, S., Shedlock, A.M., Botka, C., Castoe,  
448 T.A., Colbourne, J.K., Fujita, M.K., Moreno, R.G., ten Hallers, B.F., Haussler, D., Heger, A.,  
449 Heiman, D., Janes, D.E., Johnson, J., de Jong, P.J., Koriabine, M.Y., Lara, M., Novick,  
450 P.A., Organ, C.L., Peach, S.E., Poe, S., Pollock, D.D., de Queiroz, K., Sanger, T., Searle,  
451 S., Smith, J.D., Smith, Z., Swofford, R., Turner-Maier, J., Wade, J., Young, S., Zadissa, A.,  
452 Edwards, S. V., Glenn, T.C., Schneider, C.J., Losos, J.B., Lander, E.S., Breen, M., Ponting,  
453 C.P., Lindblad-Toh, K., 2011. The genome of the green anole lizard and a comparative  
454 analysis with birds and mammals. *Nature* 477, 587–591.  
455 <https://doi.org/10.1038/nature10390>
- 456 Audet, J.-N., Kayello, L., Ducatez, S., Perillo, S., Cauchard, L., Howard, J.T., O’Connell, L.A.,  
457 Jarvis, E.D., Lefebvre, L., 2018. Divergence in problem-solving skills is associated with  
458 differential expression of glutamate receptors in wild finches. *Sci. Adv.* 4, eaao6369.  
459 <https://doi.org/10.1126/sciadv.aao6369>
- 460 Baugh, A.T., Schaper, S. V., Hau, M., Cockrem, J.F., de Goede, P., Oers, K. van, 2012.  
461 Corticosterone responses differ between lines of great tits (*Parus major*) selected for  
462 divergent personalities. *Gen. Comp. Endocrinol.* 175, 488–494.  
463 <https://doi.org/https://doi.org/10.1016/j.ygcen.2011.12.012>
- 464 Bray, N.L., Pimentel, H., Melsted, P., Pachter, L., 2016. Near-optimal probabilistic RNA-seq  
465 quantification. *Nat. Biotechnol.* 34, 525–527. <https://doi.org/10.1038/nbt.3519>
- 466 Bruce, L.L., Braford, M.R., 2009. Evolution of the limbic system, in: Squire, L.R.B.T.-E. of N.  
467 (Ed.), *Encyclopedia of Neuroscience*. Academic Press, Oxford, pp. 43–55.  
468 <https://doi.org/10.1016/B978-008045046-9.00965-7>
- 469 Brunetti-Pierri, N., Berg, J.S., Scaglia, F., Belmont, J., Bacino, C.A., Sahoo, T., Lalani, S.R.,  
470 Graham, B., Lee, B., Shinawi, M., Shen, J., Kang, S.-H.L., Pursley, A., Lotze, T., Kennedy,  
471 G., Lansky-Shafer, S., Weaver, C., Roeder, E.R., Grebe, T.A., Arnold, G.L., Hutchison, T.,  
472 Reimschisel, T., Amato, S., Geraghty, M.T., Innis, J.W., Oberszty, E., Nowakowska, B.,  
473 Rosengren, S.S., Bader, P.I., Grange, D.K., Naqvi, S., Garnica, A.D., Bernes, S.M., Fong,  
474 C.-T., Summers, A., Walters, W.D., Lupski, J.R., Stankiewicz, P., Cheung, S.W., Patel, A.,  
475 2008. Recurrent reciprocal 1q21.1 deletions and duplications associated with microcephaly  
476 or macrocephaly and developmental and behavioral abnormalities. *Nat. Genet.* 40, 1466–  
477 1471. <https://doi.org/10.1038/ng.279>
- 478 Butler, A.B., Hodos, W., 2005. Comparative vertebrate neuroanatomy: Evolution and  
479 adaptation: Second edition, *Comparative Vertebrate Neuroanatomy: Evolution and*  
480 *Adaptation: Second Edition*. John Wiley & Sons. <https://doi.org/10.1002/0471733849>
- 481 Chen, X.-Y., Wang, H., Xue, Y., Chen, L., 2013. Modulation of paraventricular firing rate by  
482 secretin in vivo. *Neurosci. Lett.* 532, 29–32.  
483 <https://doi.org/https://doi.org/10.1016/j.neulet.2012.10.055>
- 484 Coppens, C.M., de Boer, S.F., Koolhaas, J.M., 2010. Coping styles and behavioural flexibility:  
485 towards underlying mechanisms. *Philos. Trans. R. Soc. B Biol. Sci.* 365, 4021–4028.  
486 <https://doi.org/10.1098/rstb.2010.0217>
- 487 Csillag, V., Vastagh, C., Liposits, Z., Farkas, I., 2019. Secretin regulates excitatory GABAergic

- 488 neurotransmission to GnRH neurons via retrograde NO signaling pathway in mice. *Front.*  
489 *Cell. Neurosci.* 13, 371. <https://doi.org/10.3389/fncel.2019.00371>
- 490 Desfilis, E., Abellán, A., Sentandreu, V., Medina, L., 2018. Expression of regulatory genes in the  
491 embryonic brain of a lizard and implications for understanding pallial organization and  
492 evolution. *J. Comp. Neurol.* 526, 166–202. <https://doi.org/10.1002/cne.24329>
- 493 Dunham, L.A., Wilczynski, W., 2014. Arginine vasotocin, steroid hormones and social behavior  
494 in the green anole lizard (*Anolis carolinensis*). *J. Exp. Biol.* 217, 3670–3676.  
495 <https://doi.org/10.1242/jeb.107854>
- 496 Eastman, G., Valiño, G., Radio, S., Young, R.L., Quintana, L., Zakon, H.H., Hofmann, H.A.,  
497 Sotelo-Silveira, J., Silva, A., 2020. Brain transcriptomics of agonistic behaviour in the  
498 weakly electric fish *Gymnotus omarorum*, a wild teleost model of non-breeding aggression.  
499 *Sci. Rep.* 10, 9496. <https://doi.org/10.1038/s41598-020-66494-9>
- 500 Félix, A.S., Cardoso, S.D., Roleira, A., Oliveira, R.F., 2020. Forebrain transcriptional response  
501 to transient changes in circulating androgens in a cichlid fish. *G3 Genes, Genomes, Genet.*  
502 10, 1971–1982. <https://doi.org/10.1534/g3.119.400947>
- 503 Greenberg, N., 1982. A forebrain atlas and stereotaxic technique for the lizard, *Anolis*  
504 *carolinensis*. *J. Morphol.* 174, 217–236. <https://doi.org/10.1002/jmor.1051740210>
- 505 Greenberg, N., Crews, D., 1990. Endocrine and behavioral responses to aggression and social  
506 dominance in the green anole lizard, *Anolis carolinensis*. *Gen. Comp. Endocrinol.* 77, 246–  
507 255. [https://doi.org/https://doi.org/10.1016/0016-6480\(90\)90309-A](https://doi.org/https://doi.org/10.1016/0016-6480(90)90309-A)
- 508 Hartline, J.T., Smith, A.N., Kabelik, D., 2017. Serotonergic activation during courtship and  
509 aggression in the brown anole, *Anolis sagrei*. *PeerJ* 2017, e3331.  
510 <https://doi.org/10.7717/peerj.3331>
- 511 Hofmann, H.A., 2003. Functional genomics of neural and behavioral plasticity. *J. Neurobiol.* 54,  
512 272–282. <https://doi.org/https://doi.org/10.1002/neu.10172>
- 513 Hoops, D., Desfilis, E., Ullmann, J.F.P., Janke, A.L., Stait-Gardner, T., Devenyi, G.A., Price,  
514 W.S., Medina, L., Whiting, M.J., Keogh, J.S., 2018. A 3D MRI-based atlas of a lizard brain.  
515 *J. Comp. Neurol.* <https://doi.org/10.1002/cne.24480>
- 516 Jarvis, E.D., 2008. Evolution of the Pallium in Birds and Reptiles, in: Binder, M.D., Hirokawa, N.,  
517 Windhorst, U. (Eds.), *Encyclopedia of Neuroscience*. Springer Berlin Heidelberg, Berlin,  
518 Heidelberg, pp. 1390–1400. [https://doi.org/10.1007/978-3-540-29678-2\\_3165](https://doi.org/10.1007/978-3-540-29678-2_3165)
- 519 Kabelik, D., Alix, V.C., Burford, E.R., Singh, L.J., 2013. Aggression- and sex-induced neural  
520 activity across vasotocin populations in the brown anole. *Horm. Behav.* 63, 437–446.  
521 <https://doi.org/10.1016/j.yhbeh.2012.11.016>
- 522 Kabelik, D., Alix, V.C., Singh, L.J., Johnson, A.L., Choudhury, S.C., Elbaum, C.C., Scott, M.R.,  
523 2014. Neural activity in catecholaminergic populations following sexual and aggressive  
524 interactions in the brown anole, *Anolis sagrei*. *Brain Res.* 1553, 41–58.  
525 <https://doi.org/10.1016/j.brainres.2014.01.026>
- 526 Kabelik, D., Crews, D., 2017. Hormones, Brain, and Behavior in Reptiles, in: *Hormones, Brain*  
527 *and Behavior: Third Edition*. pp. 171–213. [https://doi.org/10.1016/B978-0-12-803592-](https://doi.org/10.1016/B978-0-12-803592-4.00027-4)  
528 [4.00027-4](https://doi.org/10.1016/B978-0-12-803592-4.00027-4)
- 529 Kabelik, D., Crombie, T., Moore, M.C., 2008a. Aggression frequency and intensity, independent

- 530 of testosterone levels, relate to neural activation within the dorsolateral subdivision of the  
531 ventromedial hypothalamus in the tree lizard *Urosaurus ornatus*. *Horm. Behav.* 54, 18–27.  
532 <https://doi.org/10.1016/j.yhbeh.2007.09.022>
- 533 Kabelik, D., Hofmann, H.A., 2018. Comparative neuroendocrinology: A call for more study of  
534 reptiles! *Horm. Behav.* 106, 189–192. <https://doi.org/10.1016/j.yhbeh.2018.10.005>
- 535 Kabelik, D., Magruder, D.S., 2014. Involvement of different mesotocin (oxytocin homologue)  
536 populations in sexual and aggressive behaviours of the brown anole. *Biol. Lett.* 10,  
537 20140566. <https://doi.org/10.1098/rsbl.2014.0566>
- 538 Kabelik, D., Weiss, S.L., Moore, M.C., 2008b. Steroid hormones alter neuroanatomy and  
539 aggression independently in the tree lizard. *Physiol. Behav.* 93, 492–501.  
540 <https://doi.org/10.1016/j.physbeh.2007.10.008>
- 541 Kabelik, D., Weiss, S.L., Moore, M.C., 2006. Steroid hormone mediation of limbic brain plasticity  
542 and aggression in free-living tree lizards, *Urosaurus ornatus*. *Horm. Behav.* 49, 587–597.  
543 <https://doi.org/10.1016/j.yhbeh.2005.12.004>
- 544 Kabelik, D., Weitekamp, C.A., Choudhury, S.C., Hartline, J.T., Smith, A.N., Hofmann, H.A.,  
545 2018. Neural activity in the social decision-making network of the brown anole during  
546 reproductive and agonistic encounters. *Horm. Behav.* 106, 178–188.  
547 <https://doi.org/10.1016/j.yhbeh.2018.06.013>
- 548 Kabir, Z.D., Martínez-Rivera, A., Rajadhyaksha, A.M., 2017. From gene to behavior: L-type  
549 calcium channel mechanisms underlying neuropsychiatric symptoms. *Neurotherapeutics*  
550 14, 588–613. <https://doi.org/10.1007/s13311-017-0532-0>
- 551 Ketterson, E.D., Nolan Val, J., 1999. Adaptation, exaptation, and constraint: A hormonal  
552 perspective. *Am. Nat.* 154, S4–S25. <https://doi.org/10.1086/303280>
- 553 Kollack-Walker, S., Newman, S.W., 1995. Mating and agonistic behavior produce different  
554 patterns of Fos immunolabeling in the male Syrian hamster brain. *Neuroscience* 66, 721–  
555 736. [https://doi.org/https://doi.org/10.1016/0306-4522\(94\)00563-K](https://doi.org/https://doi.org/10.1016/0306-4522(94)00563-K)
- 556 Koolhaas, J.M., Korte, S.M., De Boer, S.F., Van Der Vegt, B.J., Van Reenen, C.G., Hopster, H.,  
557 De Jong, I.C., Ruis, M.A.W., Blokhuis, H.J., 1999. Coping styles in animals: current status  
558 in behavior and stress-physiology. *Neurosci. Biobehav. Rev.* 23, 925–935.  
559 [https://doi.org/https://doi.org/10.1016/S0149-7634\(99\)00026-3](https://doi.org/https://doi.org/10.1016/S0149-7634(99)00026-3)
- 560 Korzan, W.J., Summers, C.H., 2004. Serotonergic response to social stress and artificial social  
561 sign stimuli during paired interactions between male *Anolis carolinensis*. *Neuroscience*  
562 123, 835–845. <https://doi.org/https://doi.org/10.1016/j.neuroscience.2003.11.005>
- 563 Korzan, W.J., Summers, T.R., Ronan, P.J., Renner, K.J., Summers, C.H., 2001. The role of  
564 monoaminergic nuclei during aggression and sympathetic social signaling. *Brain. Behav.*  
565 *Evol.* 57, 317–327. <https://doi.org/10.1159/000047250>
- 566 Kruk, M.R., 1991. Ethology and pharmacology of hypothalamic aggression in the rat. *Neurosci.*  
567 *Biobehav. Rev.* 15, 527–538. [https://doi.org/https://doi.org/10.1016/S0149-7634\(05\)80144-](https://doi.org/https://doi.org/10.1016/S0149-7634(05)80144-7)  
568 7
- 569 Larson, E.T., Summers, C.H., 2001. Serotonin reverses dominant social status. *Behav. Brain*  
570 *Res.* 121, 95–102. [https://doi.org/https://doi.org/10.1016/S0166-4328\(00\)00393-4](https://doi.org/https://doi.org/10.1016/S0166-4328(00)00393-4)
- 571 Lopez, K.H., Jones, R.E., Seufert, D.W., Rand, M.S., Dores, R.M., 1992. Catecholaminergic

- 572 cells and fibers in the brain of the lizard *Anolis carolinensis* identified by traditional as well  
573 as whole-mount immunohistochemistry. *Cell Tissue Res.* 270, 319–337.  
574 <https://doi.org/10.1007/BF00328017>
- 575 Love, M.I., Huber, W., Anders, S., 2014. Moderated estimation of fold change and dispersion for  
576 RNA-seq data with DESeq2. *Genome Biol.* 15, 550. [https://doi.org/10.1186/s13059-014-](https://doi.org/10.1186/s13059-014-0550-8)  
577 0550-8
- 578 Lovern, M.B., Holmes, M.M., Wade, J., 2004. The green anole (*Anolis carolinensis*): A reptilian  
579 model for laboratory studies of reproductive morphology and behavior. *ILAR J.*  
580 <https://doi.org/10.1093/ilar.45.1.54>
- 581 Mi, H., Muruganujan, A., Ebert, D., Huang, X., Thomas, P.D., 2019. PANTHER version 14: more  
582 genomes, a new PANTHER GO-slim and improvements in enrichment analysis tools.  
583 *Nucleic Acids Res.* 47, D419–D426. <https://doi.org/10.1093/nar/gky1038>
- 584 Mukai, M., Replogle, K., Drnevich, J., Wang, G., Wacker, D., Band, M., Clayton, D.F., Wingfield,  
585 J.C., 2009. Seasonal differences of gene expression profiles in song sparrow (*Melospiza*  
586 *melodia*) hypothalamus in relation to territorial aggression. *PLoS One* 4, e8182.  
587 <https://doi.org/10.1371/journal.pone.0008182>
- 588 Naik, D.R., Sar, M., Stumpf, W.E., 1981. Immunohistochemical localization of enkephalin in the  
589 central nervous system and pituitary of the lizard, *Anolis carolinensis*. *J. Comp. Neurol.*  
590 198, 583–601. <https://doi.org/10.1002/cne.901980404>
- 591 Newman, S.W., 1999. The medial extended amygdala in male reproductive behavior. A node in  
592 the mammalian social behavior network. *Ann. N. Y. Acad. Sci.* 877, 242–257.  
593 <https://doi.org/10.1111/j.1749-6632.1999.tb09271.x>
- 594 Nishijima, I., Yamagata, T., Spencer, C.M., Weeber, E.J., Alekseyenko, O., Sweatt, J.D.,  
595 Momoi, M.Y., Ito, M., Armstrong, D.L., Nelson, D.L., Paylor, R., Bradley, A., 2006. Secretin  
596 receptor-deficient mice exhibit impaired synaptic plasticity and social behavior. *Hum. Mol.*  
597 *Genet.* 15, 3241–3250. <https://doi.org/10.1093/hmg/ddl402>
- 598 O'Connell, L.A., Hofmann, H.A., 2012. Evolution of a vertebrate social decision-making network.  
599 *Science* (80-. ). 336, 1154–1157. <https://doi.org/10.1126/science.1218889>
- 600 O'Connell, L.A., Hofmann, H.A., 2011. The vertebrate mesolimbic reward system and social  
601 behavior network: A comparative synthesis. *J. Comp. Neurol.* 519, 3599–3639.  
602 <https://doi.org/10.1002/cne.22735>
- 603 Oswald, M.E., Drew, R.E., Racine, M., Murdoch, G.K., Robison, B.D., 2012. Is behavioral  
604 variation along the bold-shy continuum associated with variation in the stress axis in  
605 zebrafish? *Physiol. Biochem. Zool.* 85, 717–728. <https://doi.org/10.1086/668203>
- 606 Pedroso, I., Lourdasamy, A., Rietschel, M., Nöthen, M.M., Cichon, S., McGuffin, P., Al-Chalabi,  
607 A., Barnes, M.R., Breen, G., 2012. Common genetic variants and gene-expression  
608 changes associated with bipolar disorder are over-represented in brain signaling pathway  
609 genes. *Biol. Psychiatry* 72, 311–317. <https://doi.org/10.1016/j.biopsych.2011.12.031>
- 610 Raynaud, J., Schradin, C., 2014. Experimental increase of testosterone increases boldness and  
611 decreases anxiety in male African striped mouse helpers. *Physiol. Behav.* 129, 57–63.  
612 <https://doi.org/https://doi.org/10.1016/j.physbeh.2014.02.005>
- 613 Réale, D., Dingemanse, N.J., Kazem, A.J.N., Wright, J., 2010. Evolutionary and ecological  
614 approaches to the study of personality. *Philos. Trans. R. Soc. B Biol. Sci.* 365, 3937–3946.



- 615 <https://doi.org/10.1098/rstb.2010.0222>
- 616 Renn, S.C.P., Aubin-Horth, N., Hofmann, H.A., 2008. Fish and chips: functional genomics of  
617 social plasticity in an African cichlid fish. *J. Exp. Biol.* 211, 3041 LP – 3056.  
618 <https://doi.org/10.1242/jeb.018242>
- 619 Rosen, G., O'Bryant, E., Matthews, J., Zacharewski, T., Wade, J., 2002. Distribution of  
620 androgen receptor mRNA expression and immunoreactivity in the brain of the green anole  
621 lizard. *J. Neuroendocrinol.* 14, 19–28. <https://doi.org/10.1046/j.0007-1331.2001.00735.x>
- 622 Sih, A., Bell, A., Johnson, J.C., 2004. Behavioral syndromes: an ecological and evolutionary  
623 overview. *Trends Ecol. Evol.* 19, 372–378. <https://doi.org/10.1016/j.tree.2004.04.009>
- 624 Sinervo, B., Miles, D.B., Frankino, W.A., Klukowski, M., DeNardo, D.F., 2000. Testosterone,  
625 endurance, and Darwinian fitness: Natural and sexual selection on the physiological bases  
626 of alternative male behaviors in side-blotched lizards. *Horm. Behav.* 38, 222–233.  
627 <https://doi.org/10.1006/hbeh.2000.1622>
- 628 Smith, A.N., Kabelik, D., 2017. The effects of dopamine receptor 1 and 2 agonists and  
629 antagonists on sexual and aggressive behaviors in male green anoles. *PLoS One* 12.  
630 <https://doi.org/10.1371/journal.pone.0172041>
- 631 Stamps, J., Groothuis, T.G.G., 2010. The development of animal personality: relevance,  
632 concepts and perspectives. *Biol. Rev.* 85, 301–325.  
633 <https://doi.org/https://doi.org/10.1111/j.1469-185X.2009.00103.x>
- 634 Striedter, G.F., 2016. Evolution of the hippocampus in reptiles and birds. *J. Comp. Neurol.* 524,  
635 496–517. <https://doi.org/10.1002/cne.23803>
- 636 Takada, Y., Ye, X., Simon, S., 2007. The integrins. *Genome Biol.* 8, 215.  
637 <https://doi.org/10.1186/gb-2007-8-5-215>
- 638 ten Donkelaar, H.J., 1998. Reptiles, in: *The Central Nervous System of Vertebrates*. Springer  
639 Berlin Heidelberg, Berlin, Heidelberg, pp. 1315–1524. [https://doi.org/10.1007/978-3-642-18262-4\\_20](https://doi.org/10.1007/978-3-642-18262-4_20)
- 641 Thompson, R.R., Walton, J.C., Bhalla, R., George, K.C., Beth, E.H., 2008. A primitive social  
642 circuit: Vasotocin-substance P interactions modulate social behavior through a peripheral  
643 feedback mechanism in goldfish. *Eur. J. Neurosci.* 27, 2285–2293.  
644 <https://doi.org/10.1111/j.1460-9568.2008.06210.x>
- 645 Tosches, M.A., Yamawaki, T.M., Naumann, R.K., Jacobi, A.A., Tushev, G., Laurent, G., 2018.  
646 Evolution of pallium, hippocampus, and cortical cell types revealed by single-cell  
647 transcriptomics in reptiles. *Science* (80-. ). 360, 881 LP – 888.  
648 <https://doi.org/10.1126/science.aar4237>
- 649 Walton, J.C., Waxman, B., Hoffbuhr, K., Kennedy, M., Beth, E., Scangos, J., Thompson, R.R.,  
650 2010. Behavioral effects of hindbrain vasotocin in goldfish are seasonally variable but not  
651 sexually dimorphic. *Neuropharmacology* 58, 126–134.  
652 <https://doi.org/10.1016/j.neuropharm.2009.07.018>
- 653 Wang, R., Chow, B.K.C., Zhang, L., 2019. Distribution and functional implication of secretin in  
654 multiple brain regions. *J. Mol. Neurosci.* 68, 485–493. <https://doi.org/10.1007/s12031-018-1089-z>
- 656 Watt, M.J., Forster, G.L., Korzan, W.J., Renner, K.J., Summers, C.H., 2007. Rapid

- 657 neuroendocrine responses evoked at the onset of social challenge. *Physiol. Behav.* 90,  
658 567–575. <https://doi.org/https://doi.org/10.1016/j.physbeh.2006.11.006>
- 659 Weiss, S.L., Moore, M.C., 2004. Activation of aggressive behavior by progesterone and  
660 testosterone in male tree lizards, *Urosaurus ornatus*. *Gen. Comp. Endocrinol.* 136, 282–  
661 288. <https://doi.org/https://doi.org/10.1016/j.ygcen.2004.01.001>
- 662 Wong, R.Y., Ramsey, M.E., Cummings, M.E., 2012. Localizing brain regions associated with  
663 female mate preference behavior in a swordtail. *PLoS One* 7, e50355.  
664 <https://doi.org/10.1371/journal.pone.0050355>
- 665 Woolley, Sarah C., Sakata, J.T., Crews, D., 2004. Tyrosine hydroxylase expression is affected  
666 by sexual vigor and social environment in male *Cnemidophorus inornatus*. *J. Comp.*  
667 *Neurol.* 476, 429–439. <https://doi.org/10.1002/cne.20236>
- 668 Woolley, Sarah C, Sakata, J.T., Crews, D., 2004. Evolutionary insights into the regulation of  
669 courtship behavior in male amphibians and reptiles. *Physiol. Behav.* 83, 347–360.  
670 <https://doi.org/https://doi.org/10.1016/j.physbeh.2004.08.021>
- 671 Woolley, S.C., Sakata, J.T., Gupta, A., Crews, D., 2001. Evolutionary changes in dopaminergic  
672 modulation of courtship behavior in *Cnemidophorus* whiptail lizards. *Horm. Behav.* 40,  
673 483–489. <https://doi.org/10.1006/hbeh.2001.1713>
- 674 Zayed, A., Robinson, G.E., 2012. Understanding the relationship between brain gene  
675 expression and social behavior: Lessons from the honey bee. *Annu. Rev. Genet.* 46, 591–  
676 615. <https://doi.org/10.1146/annurev-genet-110711-155517>
- 677
